# Supplementary material for: IPv6 address autoconfiguration in geonetworking-enabled VANETs: characterization and evaluation of the ETSI solution
Source: Springer Nature journal article supplement (doi:10.1186/1687-1499-2012-19), 2012-01-17

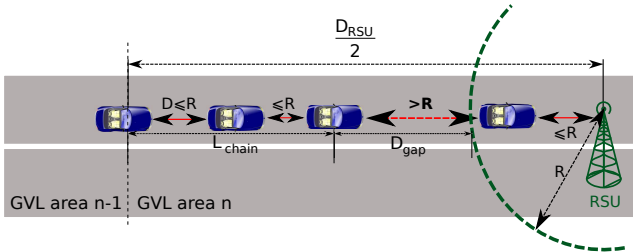

Supplement: 13638_2011_226_MOESM8_ESM.pdf [file 13638_2011_226_MOESM8_ESM.pdf]
