# Supplementary material for: IPv6 address autoconfiguration in geonetworking-enabled VANETs: characterization and evaluation of the ETSI solution
Source: Springer Nature journal article supplement (doi:10.1186/1687-1499-2012-19), 2012-01-17
Supplement: 13638_2011_226_MOESM9_ESM.pdf [file 13638_2011_226_MOESM9_ESM.pdf]

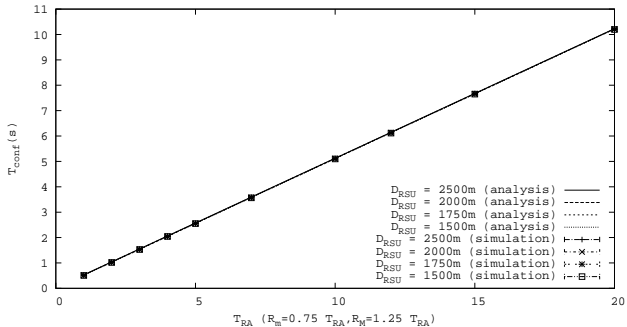

(a)  $R = 150\text{m}$
